1 **Soil conditions drive belowground trait space in temperate agricultural grasslands**

2

3 Tom Lachaise<sup>1\*</sup>, Joana Bergmann<sup>2,3,4</sup>, Norbert Hölzel<sup>5</sup>, Valentin H. Klaus<sup>6</sup>, Till  
4 Kleinebecker<sup>7</sup> Matthias C. Rillig<sup>2,4</sup> & Mark van Kleunen<sup>1,8</sup>

5 <sup>1</sup>Ecology, Department of Biology, University of Konstanz, Universitätsstrasse 10, D-78457  
6 Konstanz, Germany ; <sup>2</sup>Institute of Biology, Freie Universität Berlin, Altensteinstr. 6, D-14195  
7 Berlin, Germany; <sup>3</sup>Leibniz Centre for Agricultural Landscape Research (ZALF), D-15374,  
8 Müncheberg, Germany; <sup>4</sup>Berlin-Brandenburg Institute of Advanced Biodiversity Research  
9 (BBIB), D-14195 Berlin, Germany; <sup>5</sup>Institute of Landscape Ecology, University of Münster,  
10 Heisenbergstr. 2, 48149 Münster; <sup>6</sup>Institute of Agricultural Sciences, ETH Zürich,  
11 Universitätstr. 2, 8092 Zürich, Switzerland; <sup>7</sup>Institute of Landscape Ecology and Resources  
12 Management, University of Giessen, Heinrich-Buff-Ring 26-32, D-35392 Giessen, Germany  
13 <sup>8</sup>Zhejiang Provincial Key Laboratory of Plant Evolutionary Ecology and Conservation,  
14 Taizhou University, Taizhou 318000, China

15 \*Contact corresponding author: [tom.lachaise@gmail.com](mailto:tom.lachaise@gmail.com) ; Phone : +4916091530105

16 [joana.bergmann@zalf.de](mailto:joana.bergmann@zalf.de) ; [rillig@zedat.fu-berlin.de](mailto:rillig@zedat.fu-berlin.de) ; [mark.vankleunen@uni-konstanz.de](mailto:mark.vankleunen@uni-konstanz.de)

17 ORCID IDs: Tom Lachaise 0000-0002-5321-3195 ; Joana Bergmann 0000-0002-2008-4198 ;  
18 Norbert Hölzel 0000-0002-6367-3400 ; Valentin H. Klaus 0000-0002-7469-6800 ; Till  
19 Kleinebecker 0000-0003-1121-2861 ; Matthias Rillig 0000-0003-3541-7853 ; Mark van  
20 Kleunen 0000-0002-2861-3701

21 **Abstract**

- 22 1. Plant belowground organs perform essential functions, including water and nutrient  
23 uptake, anchorage, vegetative reproduction and recruitment of mutualistic soil  
24 microbiota. Determining how belowground traits jointly determine dimensions of the  
25 trait space and how these dimensions are linked to environmental conditions would  
26 further advance our understanding of plant functioning and community assembly.
- 27 2. Here, we investigated belowground plant-trait dimensionality and its variation along  
28 10 soil and land-use parameters in 150 temperate grasslands plots. We used eight  
29 belowground traits collected in greenhouse and common garden experiments, as well  
30 as bud-bank size and specific leaf area from databases, for a total of 313 species, to  
31 calculate community weighted means (CWMs).
- 32 3. Using PCA, we found that about 55% of variance in CWMs was explained by two  
33 main dimensions, corresponding to a mycorrhizal ‘collaboration’ and a resource  
34 ‘conservation’ gradient. Frequently overlooked traits such as rooting depth, bud-bank  
35 size and root branching intensity were largely integrated in this bidimensional trait  
36 space. The two plant-strategy gradients were partially dependent on each other, with  
37 ‘outsourcing’ communities along the collaboration gradient being more often ‘slow’.  
38 These ‘outsourcing’ communities were also more often deep-rooting, and associated  
39 with soil parameters, such as low moisture and sand content, high topsoil pH, high  
40 C:N and low  $\delta^{15}\text{N}$ . ‘Slow’ communities had large bud-banks and were associated  
41 with low land-use intensity, high topsoil pH, and low nitrate but high ammonium  
42 concentrations in the soil. We did not find a substantial role of phosphorus-  
43 availability as an indicator along the ‘collaboration’ gradient.

44        4. In conclusion, the ‘collaboration’ and ‘conservation’ gradients previously identified at  
45            the species level scale up to community level in grasslands, encompass more traits  
46            than previously described, and vary with the environment.

47

48    **Keywords:** clonal traits; environmental filtering; land-use; mycorrhiza; nitrogen;  
49    phosphorus; plant economics spectrum; root traits

## 50 **Introduction**

51 Plant traits are of major interest as they determine plant functioning (Solbrig, 1993),  
52 covary with environmental conditions (Garnier, Navas, & Grigulis, 2016), and influence  
53 ecosystem functions (de Bello et al., 2010; Hanisch, Schweiger, Cord, Volk, & Knapp, 2020).  
54 Nevertheless, traits may have low predictive power (Klimešová, Tackenberg, & Herben,  
55 2016; van der Plas et al., 2020), because there is limited understanding which and how many  
56 traits are needed in ecological studies (Shipley et al., 2016). An important step forward has  
57 been the grouping of multiple traits into a limited number of syndromes, with continuous  
58 variation in the form of gradients of plant strategies (Westoby, Falster, Moles, Vesk, &  
59 Wright, 2002; Wright et al., 2004; Chave et al., 2009; Pierce, Brusa, Vagge, & Cerabolini,  
60 2013; Díaz et al., 2016; Klimešová, Martínková, & Herben, 2018; Bergmann et al., 2020;  
61 Roddy et al., 2020). For example, Diaz et al. (2016) showed that the variation in aboveground  
62 traits can be captured by a ‘size’ gradient representing the size of whole plants and plant  
63 organs, and an ‘economic’ gradient representing the leaf economics spectrum. A similar  
64 attempt has recently addressed root traits that identified a ‘conservation’ gradient and a  
65 ‘collaboration’ gradient as two independent axes of belowground plant economy (Weemstra  
66 et al. 2016; Kramer-Walter et al. 2016; Bergmann et al. 2020).

67 Bergmann et al. (2020) suggested that in the root economic space the ‘conservation’  
68 gradient, ranging from ‘slow’ to ‘fast’, is related to carbon conservation and determined by  
69 root-tissue density and nitrogen content. In contrast, the ‘collaboration’ gradient, ranging  
70 from ‘do-it-yourself’ to ‘outsourcing’ of resource uptake to fungal partners, is reflected by  
71 specific root length and root diameter along with mycorrhizal colonization (Fig. 1a). Despite  
72 the recent progress in the understanding of trait dimensionality, several root traits with a high  
73 potential importance for plant functioning (Laliberté, 2017) were so far not integrated into the  
74 existing framework. For example, high root-branching intensity can be seen as an alternative

75 to the reliance on mycorrhiza, and may be associated with specific root length for better local  
76 soil exploitation (Kong et al., 2014; Freschet et al., 2020; Ding et al., 2020). Thus it may be  
77 indicative of a ‘do-it-yourself’ strategy. Furthermore, rooting depth is also likely to be an  
78 important source of interspecific variation as it varies considerably across biomes (Schenk &  
79 Jackson, 2002), and could explain overyielding in grasslands via the mechanism of resource  
80 partitioning (Mommer et al., 2010; Mueller, Tilman, Fornara, & Hobbie, 2013). As deep-  
81 rooting species are able to take up nutrients and water from deeper soil layers, rooting depth  
82 might be part of the ‘fast’ strategy of the conservation gradient (Fig. 1a). However, up to now  
83 many of these belowground traits received much less attention, limiting a comprehensive  
84 understanding of the plant-soil interface.

85         Belowground organs other than roots add another layer of complexity in terms of  
86 form and function to plant-trait space. Plant structures such as rhizomes, root buds and tubers  
87 play important roles in storage and vegetative reproduction (Klimešová, Martínková, &  
88 Ottaviani, 2018). Species with large bud-bank size are more likely to be perennial and ‘slow’  
89 growing (E-Vojtkó et al. 2017). Furthermore, although not strictly a belowground trait, the  
90 root-weight ratio, i.e. the proportion of biomass allocated to roots, is a useful indicator of  
91 plant investment into the uptake and storage of different resources (Reynolds & D’Antonio,  
92 1996), and may be linked to rooting depth (Schenk and Jackson 2002a) and bud-bank size. It  
93 remains to be tested, whether these belowground traits are aligned with the ‘conservation’ or  
94 ‘collaboration’ gradient, or rather represent independent plant strategies.

95         In grassland communities, which cover about 40% of the continents excluding  
96 Greenland and Antarctica (Suttie, Reynolds, & Batello, 2005), the few studies on  
97 belowground traits and their variation along environmental gradients are generally limited to  
98 root morphological traits and only use a limited set of coarse environmental parameters  
99 (Craine, Froehle, Tilman, Wedin, & Chapin, 2001; Prieto et al., 2015; Erktan et al., 2018).

100 Analysing the relationships between aboveground traits and various types of environmental  
101 factors, such as climate, soil properties and land-use intensity, has already improved our  
102 understanding of trait variation in grasslands (Garnier et al., 2007), and should also be  
103 applied to belowground traits. In particular, plants may have various strategies to deal with  
104 nutrient deficits and imbalances in soils. For example, it is likely that mycorrhizal  
105 collaboration becomes more important at soils with limited phosphorus (P) availability (Ma et  
106 al., 2020). Similarly the form of plant-available mineral soil nitrogen (ammonium versus  
107 nitrate) could also select for different belowground traits, as species vary in their preference  
108 for different forms of N (Weigelt, Bol, & Bardgett, 2005; Pornon, Escaravage, & Lamaze,  
109 2007; Maire, Gross, Da Silveira Pontes, Picon-Cochard, & Soussana, 2009).

110 To better understand how belowground plant traits relate to environmental variation,  
111 we investigated 1) how community mean values of different belowground traits align along  
112 known plant-strategy gradients, and 2) how the shifts of community means along these  
113 strategy gradients depend on environmental variables. Thus, we complemented traits defining  
114 the gradients of the root economics space with additional traits that might represent  
115 independent strategies of plant functioning. Therefore, we measured traits of plants grown in  
116 pot and used database information and vegetation relevés to calculate community weighted  
117 means of belowground traits for 150 grassland plots in Germany. We then assessed the  
118 dimensionality of the variation in community weighted means of ten traits with principal  
119 component analysis (PCA), and related the principal components to ten land-use intensity and  
120 soil variables. A priori hypotheses of the relationships between traits, plant strategy  
121 dimensions and environmental variables are presented in Fig. 1.

122

123 **Figure 1.** Hypothesized relationships between (A) community weighted means (CWMs)  
 124 of belowground traits in grasslands potentially aligned on two plant-strategy gradients. A  
 125 ‘conservation’ and a ‘collaboration’ gradient are expected as the main dimensions of plant  
 126 variation, as our trait selection contains mostly traits of the root economics space. A  
 127 ‘vegetative reproduction’ and ‘vertical space occupancy’ aspect could represent additional  
 128 plant-strategy gradients, or be embedded within the ‘conservation’ and ‘collaboration’  
 129 gradients. The two known belowground dimensions are here represented as two orthogonal  
 130 axes (‘Conservation’ and ‘Collaboration’) with the traits that have previously shown to be  
 131 associated with them in black font. The positions of four other traits, bud-bank size, root  
 132 weight ratio, branching intensity and rooting depth 50% (grey font), are yet unknown. (B) As  
 133 a result of environmental filtering, each plant-strategy gradient could be associated with  
 134 different or overlapping environmental variables. The signs and colors indicate the  
 135 hypothesized direction of the relationships. The references on which these hypothesized  
 136 relationships are based can be found in Appendix S4.

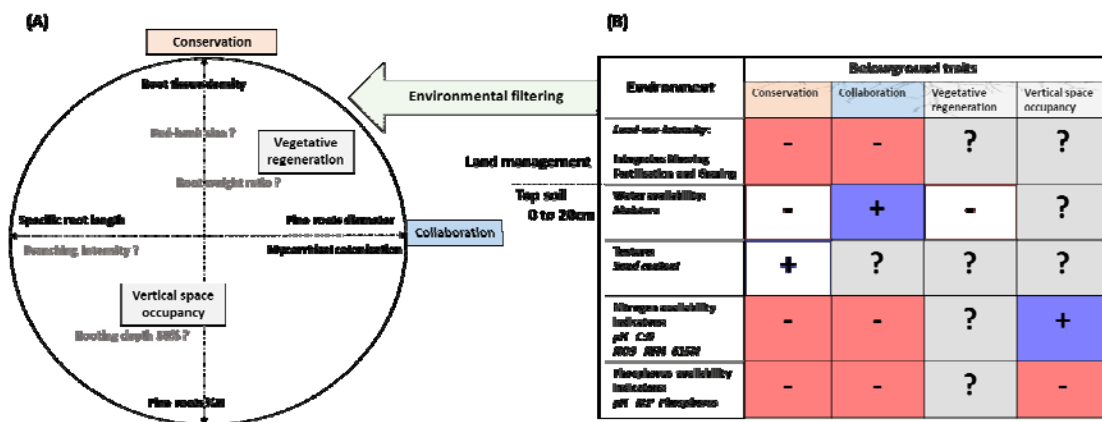

137

138 **Methods**

139 **Data on grassland vegetation composition**

140 The plant-community data used as a baseline for Central European mesic grassland  
141 vegetation originate from the ‘Biodiversity Exploratories’ project (Fischer et al., 2010). In  
142 each of three regions of Germany, the Schwäbische-Alb (south-western Germany), Hainich-  
143 Dün (central Germany), and Schorfheide-Chorin (north-eastern Germany), 50 grasslands  
144 covering a wide range of land-use intensities were selected. From 2008 to 2019, the  
145 vegetation composition of a 4 m × 4 m plot in each of the 150 grasslands was assessed  
146 annually in May/June by identifying all vascular plant species and estimating their cover. To  
147 align the species names between the vegetation and trait datasets, we standardized the species  
148 names according to the accepted names in The Plant List ([www.theplantlist.org](http://www.theplantlist.org), accessed 15  
149 June 2019, using the Taxonstand R package (Cayuela, La Granzow-de Cerda, Albuquerque,  
150 & Golicher, 2012). In total, 319 vascular plant species have been identified in the 150  
151 grassland plots.

152 **Plant species traits**

153 We obtained mean species values for eight traits from four pot experiments that we  
154 performed, and for two further traits from databases. For 291 of the 319 grassland species, we  
155 were able to obtain seeds from commercial seed suppliers or botanical gardens. We then  
156 performed four pot experiments to measure species traits. *Taraxacum* spp. are abundant in the  
157 grassland plots, though, due to their complex taxonomy, rarely identified at the species level.  
158 We here used trait values of *Taraxacum campylodes* for *Taraxacum* spp. The trait values are  
159 part of a previously published dataset (Lachaise, Bergmann, Rillig, & van Kleunen, 2020)  
160 and an unpublished dataset (Bergmann et al. *unpublished data*), and comprehensive  
161 descriptions of the experiments are provided in Appendix S1. In brief, we did one greenhouse



162 experiment in which we grew 2659 individual plants, representing 216 species, for four  
163 weeks after which we weighed the roots and analysed scanned images of the roots with  
164 WinRHIZO 2017a software (Regent Instruments Inc., Canada) to determine root tissue  
165 density, specific root length, fine root diameter, root weight ratio and root branching intensity  
166 (Lachaise et al., 2020). We did a second greenhouse experiment using 2007 plants,  
167 representing 196 species, to determine the nitrogen content of fine roots (Fine roots %N)  
168 using isotope-ratio mass spectrometry. In a third greenhouse pot experiment, we determined  
169 mycorrhizal colonization rate for 225 plants, representing 75 species that are among the most  
170 common ones in the grasslands plots (mean cover of 65%, Appendix S3). Six weeks after  
171 inoculation with spores of *Rhizophagus irregularis* (see Bergmann et al. *unpublished data*),  
172 roots were harvested and washed, and the percentage of mycorrhizal colonization was  
173 determined using the line-intersect method (McGonigle, Miller, Evans, Fairchild, & Swan,  
174 1990). In a fourth experiment, we grew 752 plants, representing 183 species, in outdoors  
175 growth-tubes to determine the depth above and below which plants have 50% of their root  
176 biomass (Rooting depth 50%, see Appendix S1 or Schenk & Jackson, 2002 for the  
177 calculation method) for about 16 weeks. In addition, to have an estimate of the belowground  
178 regeneration potential, we extracted bud-bank size, including stem and root-derived buds  
179 occurring belowground or at the soil surface, from the CLO-PLA database (Klimešová,  
180 Danihelka, Chrtěk, de Bello, & Herben, 2017) for 313 of the 319 species. Finally, to also  
181 have a reliable indicator of the plant communities' acquisitive side of the plant economics  
182 spectrum (Allan et al., 2015; Busch et al., 2019), we extracted specific leaf area, the one and  
183 only aboveground trait in our analyses, for 279 of the 319 species from the LEDA database  
184 (Kleyer et al., 2008).

#### 185 **Environmental variables of grassland plots**

186 To relate the different dimensions of variation in community weighted trait means of  
187 the grassland plots to the abiotic environment, we used ten environmental variables related to  
188 land-use intensity and soil conditions. The goal was to capture a relatively independent set of  
189 descriptors likely to drive the belowground functioning of plants. A detailed description of  
190 each variable can be found in Appendix S2. We used the land-use-intensity index (Blüthgen  
191 et al., 2012), which aggregates the intensity of mowing, fertilization and grazing, and is a  
192 major driver of ecosystem properties (Allan et al., 2015). We used a variety of  
193 physicochemical indicators related to soil fertility of the topsoil (0-20 cm): Soil-moisture  
194 content and sand content were measured to capture soil water availability and texture,  
195 respectively. Soil pH was chosen, as it affects the availability of essential plant nutrients such  
196 as P in soils. We used soil extractable  $\text{NO}_3$ ,  $\text{NH}_4$  and  $\delta^{15}\text{N}$  as indicators of soil nitrogen  
197 availability and related processes (Robinson, 2001; Kleinebecker et al., 2014), and the C:N  
198 ratio as a coarse indicator of stoichiometry and organic matter decomposability  
199 (Schachtschabep, Blume, Brümmer, Hartge, & Schwertmann, 1998). We further made use of  
200 resin-bag-adsorbed phosphorus and the N:P ratio to capture phosphorus availability in soil  
201 (Güsewell, 2004). Because soil volume is a central element in soil fertility and root-system  
202 distribution, we used data on soil bulk density to convert per-mass nutrient concentrations to  
203 per-volume concentrations (Appendix S2). Few of the grassland-site descriptors were  
204 measured for each of the years for which we had vegetation-composition data (i.e. for the  
205 period 2008-2019). However, we tried to maximize the coverage for this period by using all  
206 available census dates for these variables (see Appendix S2 for years covered) and averaging  
207 the values per plot.

## 208 **Statistical analyses**

209 All the statistics were done using R v 4.0.1 (R Core Team, 2020).

210 *Community weighted trait means*

211 To characterize the plant communities of each of the 150 grassland plots based on  
212 values of functional traits of their species, we calculated community weighted means  
213 (CWMs) as

$${}_{cwm}Trait = \sum_{j=1}^S p_j Trait_j$$

214 Here  $p_j$  is the relative cover of species  $j$  in the community,  $Trait_j$  is the trait value of species  $j$ ,  
215 and  $S$  is the number of species in the community with available trait data. Because some plots  
216 had patches of bare soil in some of the annual vegetation surveys, and because for some  
217 species trait data were missing, we normalized plant cover to cumulate to 100% for all  
218 species with available trait data in each plot before calculating the CWMs. As we have trait  
219 data for most of the dominant grassland species, we have data for about 90% of the total  
220 cover in most plots, for most traits (Appendix S3). The only exception is mycorrhizal  
221 colonization, which was only available for 78 species, but, even for that trait, the average  
222 cover of species included was 65% (range 32 - 87%, Appendix S3).

223 *Principal components of CWMs variation*

224 As the CWMs of several traits were correlated (Appendix S10), we performed  
225 principal component analyses (PCA) to reduce the dimensionality of the data. To assess how  
226 robust the resulting dimensions are to the inclusion of additional information, we performed  
227 four separate PCAs. Each of these PCAs included all nine belowground traits, but they  
228 differed in that we also included or excluded  ${}_{cwm}Specific\ leaf\ area$ , as one of the major traits  
229 associated with the aboveground ‘fast’ side of the plant economics spectrum, and that we  
230 included or excluded plant-functional-type information (i.e. the percentages cover of

231 graminoids, N-fixing forbs and non-N-fixing forbs). So, one PCA included CWMs of  
232 belowground traits only (“Belowground PCA”), one additionally included *CWM**Specific leaf*  
233 *area* (“Above-Belowground PCA”), one additionally included the proportions of Poales,  
234 Fabaceae and non-Fabaceae forbs, and one included all. To increase the separation of the  
235 variable loadings (the trait CWMs) on the two first axes, we performed an ‘oblimin’ rotation  
236 on these axes for the Belowground PCA and the Above-Belowground PCA. To complement  
237 the information provided on taxonomic or phylogenetic influence on community trait values,  
238 we also looked at the ten most dominant species or taxa in the trait space formed by PC1 and  
239 PC2 and the indicator species or taxa that associated with each quadrant of the two-  
240 dimensional space formed by PC1 and PC2 (Appendix S15). As the proportion of plant  
241 functional types were shown to be significantly related to specific plant strategies in PC1 and  
242 PC2 (Appendix S6, Appendix S10), we also did three additional versions of the Above-  
243 Belowground PCA, removing each plant functional type in the CWMs calculation once, to  
244 evaluate how much the trait relationships are affected by the presence of the respective plant  
245 functional type (Appendix S7). To compare the relationships observed at the community  
246 level and at the species level, we also did the Above-Belowground PCA using trait means of  
247 the species instead of CWMs (Appendix S16). For each PCA, *CWM**Root tissue density* was  
248  $\log_{10}$  transformed and for each trait or proportion of plant functional type, data was  
249 standardized by subtracting the mean and dividing by the standard deviation to conform to  
250 the multinormality requirements.

### 251 *Associations of the principal components of CWMs with environmental variables*

252 To test for associations between the principal components of CWMs of the grassland  
253 plots and the environmental variables, we performed multiple regression. The PC1 and PC2  
254 scores from each of the four PCAs on CWMs of the functional traits were used as response  
255 variables, and the environmental variables were used as predictors. C:N, N:P, sand content,

256 NH<sub>4</sub>, NO<sub>3</sub>, and δ<sup>15</sup>N were log-transformed before analysis to get a more regular (less  
257 clumped) distribution of the predictor values. To account for the fact that the grassland plots  
258 are located in three different regions of Germany, we also included region as a predictor in  
259 the models. For model reduction, backward stepwise model selection based on AIC was  
260 performed using the function `step()`. This procedure selects a parsimonious set of predictors  
261 while minimizing the variance inflation factor (max VIF = 3.6 for Above-Belowground  
262 PCA). Because the two first axes (PC1 and PC2) of the four PCAs produced similar scores  
263 for the CWMs of the grassland plots (all pairwise correlations of the PC1s were >0.98 and  
264 those of the PC2s were >0.67), we present the results of the analysis of the “Above-  
265 Belowground PCA” in the main text (Fig. 3 based on the PC axes of Fig. 2), and the results  
266 for the other three PCAs in Appendix S8. We did the same for the PC3 to PC6 scores from  
267 the Above-Belowground PCA (Appendix S13), and for each of the ten *c<sub>WM</sub>Traits* (Appendix  
268 S14). We further tested if the proportion of the three plant functional types, as related to the  
269 trait dimensions, responded to environmental variables in a similar way, and ran the same  
270 models with the proportion of plant functional types as the response variables (Appendix  
271 S12).

272

## 273 **Results**

### 274 *Dimensionality of CWMs*

275 The Above-Belowground PCA (Fig. 2, Appendix S5) as well as the other three PCAs  
276 (Appendix S5, S6) revealed that the two first axes generally explained about 55-60% of the  
277 total trait variance, and that each of the 10 traits had intermediate to strong loadings on at  
278 least one of these two axes (Appendix S9). PC1 had strong negative loadings of  
279 *c<sub>WM</sub>Specific root length* and *c<sub>WM</sub>Branching intensity*, and strong positive loadings of

280  $C_{WM}Mycorrhizal\ colonization$ ,  $C_{WM}Fine\ roots\ \%N$ , and  $C_{WM}Fine\ roots\ diameter$ . PC2 had  
281 strong positive loadings of  $C_{WM}Bud\text{-}bank\ size$ ,  $C_{WM}Root\ weight\ ratio$ , and  
282  $C_{WM}Root\ tissue\ density$ , and strong negative loadings of  $C_{WM}Specific\ leaf\ area$ . PC1 thus  
283 overall captured the mycorrhizal ‘collaboration’ gradient of the root economic space, and  
284 PC2 captured the resource ‘conservation’ gradient. The traits of the two gradients of plant  
285 functioning, the ‘collaboration’ and the ‘conservation’ gradients were, however, only  
286 partially independent (see CWMs correlations in Appendix S10). The ‘fast’ strategy tended to  
287 associate with the ‘do-it-yourself’ strategy.  $C_{WM}Rooting\ depth\ 50\%$  loaded rather strongly on  
288 both of these two PCs (Fig 2A; Appendix S9), suggesting that deep-rooting communities  
289 were associated with the ‘outsourcing’ side of the ‘collaboration’ gradient as well as the ‘fast’  
290 side of the ‘conservation’ gradient.

#### 291 *Associations of the dimensions of CWMs with environmental variables*

292 The position of grassland communities along the ‘collaboration gradient’ (PC1) and  
293 the ‘conservation’ gradient (PC2) was significantly related to several environmental variables  
294 (Fig. 3). The  $\delta^{15}N$  isotopic signal, sand content and moisture of the topsoil were associated  
295 with the ‘do-it-yourself’ side of the ‘collaboration’ gradient (*i.e.* had negative effects on  
296 PC1). Land-use intensity and  $NO_3$  content were retained by the model-selection procedure, as  
297 associating with the ‘do-it-yourself’ side, but their effects were not significant (Fig. 3a). The  
298 pH and C:N ratio, on the other hand, were associated with the ‘outsourcing’ side of the  
299 ‘collaboration’ gradient (*i.e.* had positive effects on PC1; Fig. 3a).

300 Among the environmental variables,  $NO_3$  content and land-use intensity were  
301 significantly associated with ‘fast’ communities (*i.e.* had negative effects on PC2; Fig. 3b).  
302 Phosphorus content was also associated with ‘fast’ communities, but this effect was only  
303 marginally significant (Fig. 3b).  $NH_4$  content and pH, on the other hand, were significantly

304 associated with the ‘slow’ communities (*i.e.* had positive effects on PC2; Fig. 3b). The effects  
305 and the variance explained by the different models are comparable for the four PCAs, with  
306 and without  $c_{WM}$  Specific leaf area and with and without the plant functional types (Appendix  
307 S6).

308 **Figure 2** The two first PCs of the Above-belowground PCA, explaining 56.4% of the total  
309 variance in community weighted means (CMWs). Every *c<sub>WM</sub>Trait* has a strong loading on  
310 either PC (Appendix S9). The subsequent PCs, including PC3 representing 14.8% of the total  
311 variance (Appendix S5), mainly captured variation among the three regions, probably  
312 capturing differences in regional species pool, but did not strongly relate to any  
313 environmental parameter (Appendix S13). The sole aboveground trait that we included,  
314 *c<sub>WM</sub>Specific leaf area*, is shown in green. The scores of the 150 grassland plots used for the  
315 PCA are shown in different colors for each of the three regions (red for the Schwäbische Alb,  
316 brown for Hainich, blue for Schorfheide, each with N=50). PC1 is mostly characterized by  
317 CWMs of traits related to the mycorrhizal ‘collaboration’ gradient of the root economic  
318 space, with on the left, the ‘do-it-yourself’ strategy and on the right, the ‘outsourcing’  
319 strategy. PC2 is more characterized by CWMs of traits related to the ‘conservation’ gradient  
320 of a ‘root and leaf economic spectrum’, with on the top, the ‘slow’ strategy and on the  
321 bottom, the ‘fast’ strategy. Bud-bank size, as a surrogate of the vegetative regeneration  
322 potential is associated with the ‘slow’ strategy. Correlation coefficients between the CWMs  
323 are provided in Appendix S10 and corroborate the relationships observed on PC1 and PC2.  
324 The loadings onto PC1 to PC6 (90% of variance explained) are in Appendix S9. To maximize  
325 the loadings of the traits characteristic of the ‘collaboration’ and ‘conservation’ gradients on  
326 PC1 and PC2, an “oblimin” rotation was performed on the plot scores.



## Community Weighted Means

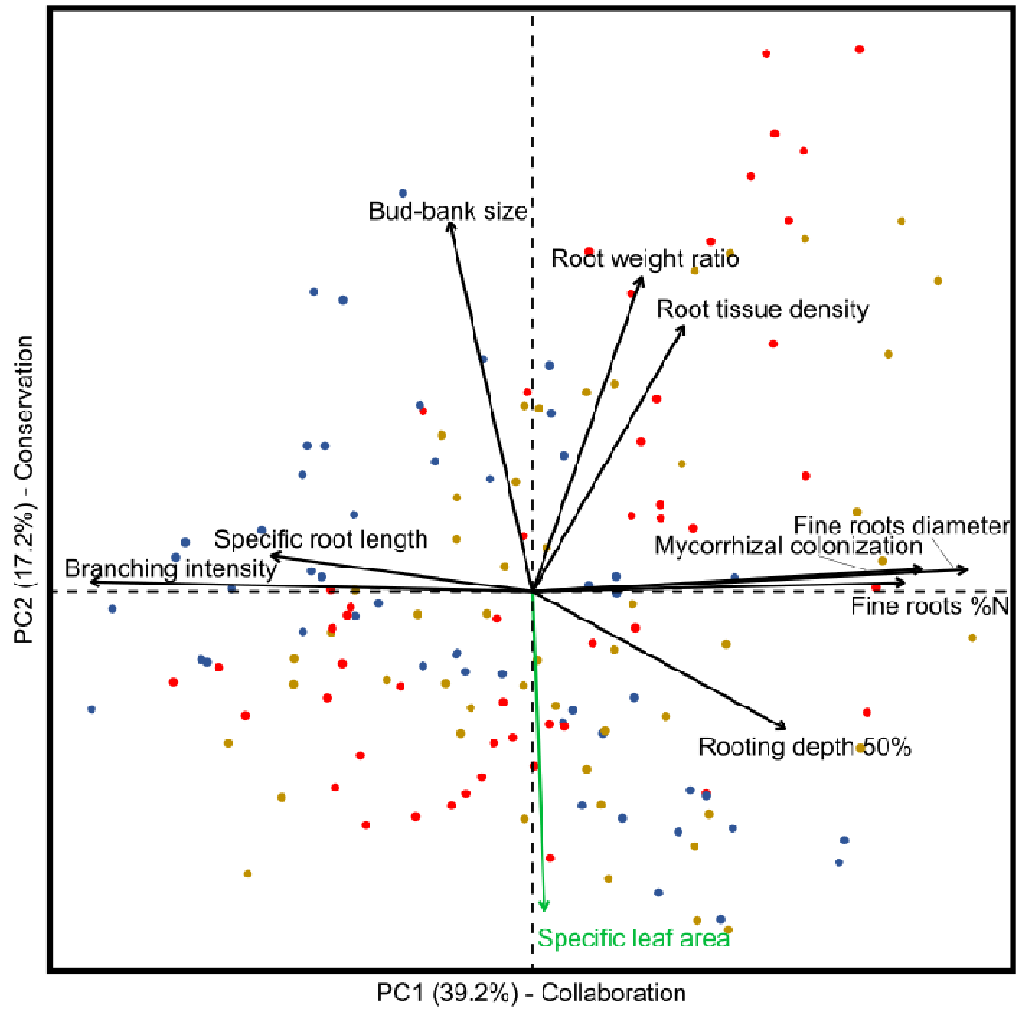

328 **Figure 3** Estimates from linear models testing the effects of environmental variables on PCA  
329 scores for (A) PC1 - ‘Collaboration’ gradient and (B) PC2 - ‘Conservation’ gradient from the  
330 Above-Belowground PCA on community weighted means of traits. On the y-axis are the nine  
331 environmental variables that were retained in the most parsimonious models (Region and N:P  
332 were not retained). The error bars around the estimates are standard errors. Significant (\* for  
333  $p < 0.05$  ; \*\* for  $p < 0.01$  ; \*\*\* for  $p < 0.001$ ) negative and positive estimates are marked in  
334 red and blue, respectively. Non-significant ( $p > 0.05$ ) estimates are marked in grey.  
335 Marginally significant ( $p < 0.10$ ) estimates are marked with †.

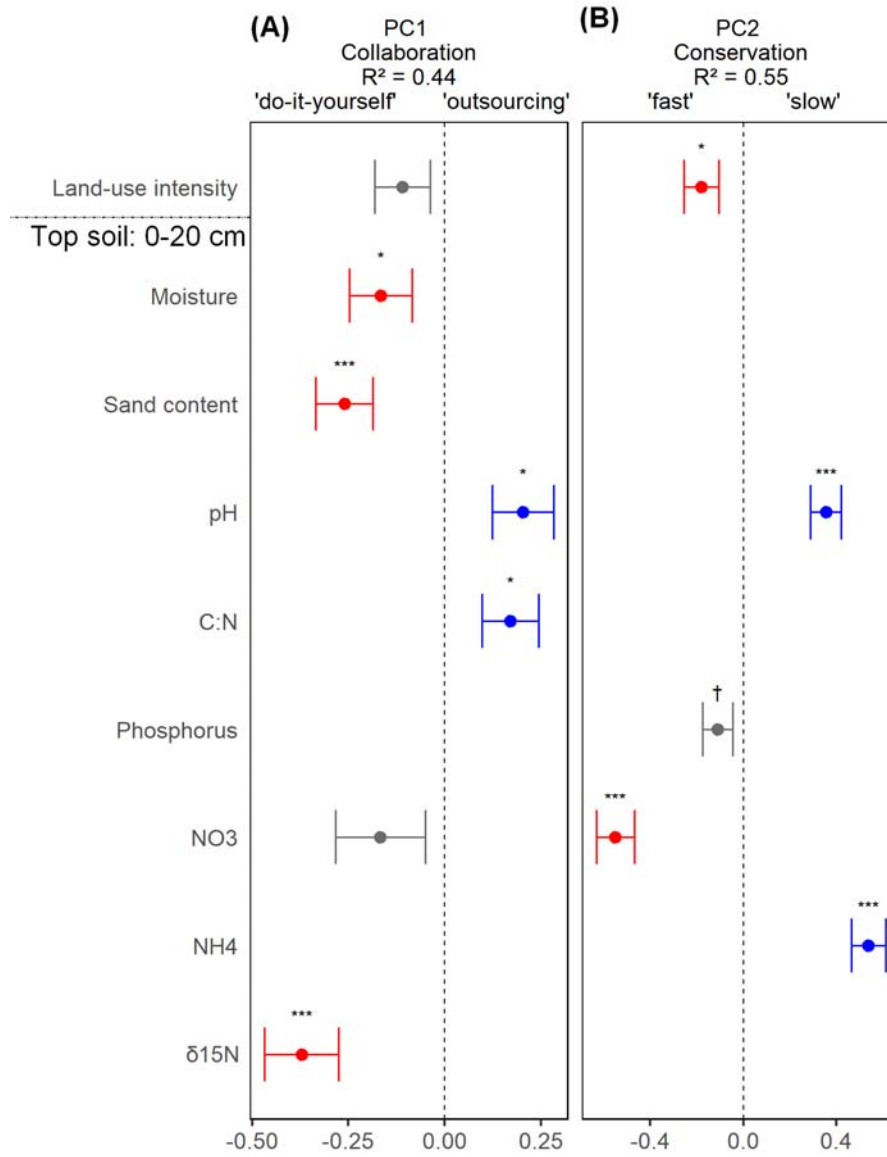

336

## 337 **Discussion**

338           We investigated the belowground trait dimensionality of grassland communities and  
339 found that a ‘collaboration’ (do-it-yourself vs. outsourcing) and a ‘conservation’ (slow vs.  
340 fast) gradient (*sensu* Bergmann et al. 2020) explained most of the variation in community-  
341 weighted means of belowground traits. Three traits that were not considered previously in the  
342 belowground trait space were largely part of these two dimensions. *CWMRooting depth 50%*  
343 was associated with the ‘outsourcing’ and ‘fast’ strategies, *CWMBranching intensity* with the  
344 ‘do-it-yourself’ strategy, and *CWMBud-bank size* with the ‘slow’ strategy. *CWMFine root %N*  
345 was surprisingly associated with the ‘outsourcing’ strategy. Both gradients responded to  
346 environmental variables related to soil conditions, and more fertile soils were generally  
347 associated with the ‘fast’ and the ‘do-it-yourself’ strategies. In line with this, we also found  
348 that land-use intensity was associated with the ‘fast’ strategy and tended to be associated with  
349 the ‘do-it-yourself’ strategy.

## 350 **Trait relationships and dimensionality of belowground traits**

351           For the grasslands in our study, variation in community weighed means of  
352 belowground traits tended to separate along two dimensions that largely correspond to the  
353 two ecological root-trait gradients recently identified for species. PC1 related to the  
354 collaboration of plants with mycorrhizal fungi. This ‘collaboration’ gradient (Bergmann et  
355 al., 2020) ranged from ‘outsourcing’ communities with a high mycorrhizal colonization rate  
356 and thick roots but also, surprisingly, high root nitrogen content, to ‘do-it-yourself’  
357 communities with high specific root length and a high root-branching intensity. PC2 related  
358 to the construction cost of roots and leaves and the vegetative regeneration potential. This  
359 ‘conservation’ gradient ranged from ‘slow’ communities with high root-tissue density, high  
360 root-weight ratio and large bud-banks to ‘fast’ communities with high specific leaf area.  
361 *CWMRooting depth 50%* relates to both of these PCs, with deep-rooting communities being

362 ‘outsourcing’ and ‘fast’. To maximize the loadings of the traits onto one of the PC axes, we  
363 used an ‘oblimin’ rotation, and as a consequence the PCs are not orthogonal to each other.  
364 This also shows that the two plant-strategy gradients (i.e. PC1 and PC2) were not entirely  
365 independent, as the ‘fast’ strategy and ‘do-it-yourself’ strategy partly coincide, both with PC1  
366 and PC2 scores, and with the traits that are associated with each strategy (Appendix S10).  
367 This is partly in accordance with recent findings of Laughlin et al. (2021) who found cold  
368 climatic conditions to enhance the probability of occurrence for both ‘fast’ as well as ‘do-it-  
369 yourself’ plant species in a global analysis.

370         At the community level, belowground trait relationships can differ from the one found  
371 at the inter-specific level (Craine et al., 2001; Roumet, Urcelay, & Díaz, 2006; Prieto et al.,  
372 2015; Schroeder-Georgi et al., 2016; Zhou, Bai, Zhang, & Zhang, 2018; Erktan et al., 2018;  
373 Delpiano, Prieto, Loayza, Carvajal, & Squeo, 2020). The trait clustering we found for CWMs  
374 was generally in accordance with previous findings of trait clustering among species, both for  
375 trees and herbaceous plants (Weemstra et al., 2016; Kramer-Walter et al., 2016; Bergmann et  
376 al., 2020). The main exception was  $CWM_{Fine\ roots\ \%N}$ , which in our study associated with  
377 the ‘outsourcing’ side of the collaboration gradient instead of the ‘fast’ side of the  
378 conservation gradient. This might be particular to our study using CWMs, as root nitrogen  
379 content relates to both the ‘fast’ and the ‘outsourcing’ strategies when we do the PCA at the  
380 species level (Appendix S16a), but only with the ‘outsourcing’ strategy when scaling up to  
381 community level (Fig. 2). Trait-performance relationships have already been shown to differ  
382 between common garden and field condition in the Biodiversity Exploratories grasslands  
383 (Breitschwerdt, Jandt, & Bruelheide, 2019). The differences in relationships among species  
384 traits and among community weighted means of traits could reflect the multiple constraints  
385 exerted by environmental filtering on the trait values selected in a field context. More effort

386 will be required to disentangle filtering effects and phenotypic changes when traits are  
387 assessed in controlled versus field conditions.

388         We found that communities with large bud-banks were on the ‘slow’ side of the  
389 ‘conservation’ gradient. Previously, bud-bank size was shown to be rather independent of the  
390 plant economics spectrum, as specific leaf area — a key trait in this spectrum — explained  
391 less than 2% of variation in bud-bank size among 1359 herbaceous species (Klimešová et al.,  
392 2016). In our study, the correlation between bud-bank size and specific leaf area of species  
393 mean values was significantly negative ( $-0.17$ ,  $p < 0.01$ ; Appendix S16b), though still weaker  
394 than between the corresponding CWMs ( $-0.34$ ; Appendix S10). Because all of our species  
395 were selected based on their presence in permanent grasslands, it could be that the association  
396 between bud-bank size and ‘conservation’ traits is a feature of this specific habitat.  
397 Nevertheless, inclusion of other traits linked to clonality, such as clonal lateral spread, shoot  
398 persistence or bud-bank depth could reveal specific clonal strategies (Herben & Klimešová,  
399 2020), potentially increasing the dimensionality of belowground trait space (Ladouceur et al.,  
400 2019). The smaller bud-bank size we observed in communities with the ‘fast’ strategy,  
401 typical of resource rich grasslands, where competition for light might be more intense  
402 (Hautier, Niklaus, & Hector, 2009) could indicate that those plants invest more in immediate  
403 aboveground light-harvesting structures at the cost of future regrowth ability. In line with  
404 this, we also found that low root weight ratios are indicative of ‘fast’ communities.

#### 405 **Variation in community-trait dimensions explained by the environment**

406         The ‘collaboration’ and ‘conservation’ gradient in PCA were associated with several  
407 environmental variables, partly in an overlapping and partly in a unique manner. About half  
408 of the variation in PC1 and PC2 scores was explained by environmental variables. Along the  
409 ‘collaboration’ gradient, the ‘outsourcing’ strategy was found on dry, non-acidic soils with a

410 low sand content and low N availability (i.e. high C:N, low  $\delta^{15}\text{N}$  and marginally low  $\text{NO}_3$ ),  
411 and tended to be associated with a low land-use intensity (although not significantly). Along  
412 the ‘conservation’ gradient, the ‘slow’ strategy was found on non-acidic soils with low P and  
413  $\text{NO}_3$  but high  $\text{NH}_4$  availabilities, and in sites with low land-use intensities. Hence, although  
414 the ‘outsourcing’ and ‘slow’ strategies correspond to two different plant-strategy gradients,  
415 they both tend to be associated with relatively unproductive soils under low land-use  
416 intensity. In fact, all plots in the related upper right section of the PCA diagram originate  
417 from calcareous grasslands on shallow, infertile Rendzic Leptosols that are mostly used as  
418 unfertilized sheep pasture and characterized by P or NP-limitation (Klaus et al., 2011).

419 The relationships we found between the ‘collaboration’ gradient and environmental  
420 variables are generally in accordance with the current knowledge in mycorrhizal ecology. For  
421 example, (Hempel et al., 2013) found, that among 1752 species of the German flora,  
422 obligatory mycorrhizal species tended to be positively associated with dry, non-acidic,  
423 infertile habitats. In line with this, we found that drier top soils were associated with deeper  
424 rooting, more mycorrhizal-associating communities (Fig. 3, Appendix S14). While  
425 mycorrhiza have a well-known positive effect under water limited conditions (Augé, 2001),  
426 deeper roots allow the uptake of water from deeper soil layers (Fan, Miguez-Macho, Jobbágy,  
427 Jackson, & Otero-Casal, 2017). We found that ‘outsourcing’ communities were also linked  
428 with lower  $\delta^{15}\text{N}$  isotopic ratios of the soil. The value of  $\delta^{15}\text{N}$  in the soil is the result of  
429 multiple processes implicated in the nitrogen cycle and by the primary source of nitrogen in  
430 the system, which can be fixation by legumes and organic or inorganic fertilisation  
431 (Robinson, 2001). In previous work at the same plots, a high  $\delta^{15}\text{N}$  has been linked to higher  
432 plant productivity and lower species richness, potentially indicating a more open N-cycle  
433 with enhanced nitrogen losses (e.g. via leaching) and the dominance of few species with a  
434 ‘fast’ strategy (Kleinebecker et al., 2014). Indeed,  $\delta^{15}\text{N}$  is strongly positively correlated with

435 NO<sub>3</sub> concentration in the soil and moderately with NH<sub>4</sub>, moisture and land-use intensity  
436 (Appendix S11). If interpreted as an indicator of more plant-available nitrogen in soils, the  
437 negative relationship between δ<sup>15</sup>N and the ‘outsourcing’ strategy is in line with the finding  
438 of reduced mycorrhizal colonization in response to nitrogen addition (Ma et al., 2020) and  
439 with our finding that ‘outsourcing’ communities tend to be on the ‘slow’ side of the  
440 ‘conservation’ gradient.

441 As arbuscular mycorrhizal fungi are known to help plants with the uptake of  
442 phosphorus, we expected that communities on soils with low phosphorus content would score  
443 high on the ‘collaboration’ gradient. Nitrogen addition generally decreases the degree of  
444 mycorrhizal colonization in conditions of high P availability and increases it under low P  
445 availability at the plot level (Ma et al., 2020). Arbuscular mycorrhizal fungi could also help  
446 with nitrogen uptake under conditions of high phosphorus concentrations, with a possible  
447 negative relationship between N:P and mycorrhizal colonization rates (Blanke et al., 2005;  
448 Blanke et al., 2011). Soils depleted in P or in which P is not plant-available are also selecting  
449 root systems with little reliance on mycorrhiza, for example by having cluster roots and  
450 carboxylate exudation to mobilize inorganic phosphorus (Lambers, Bishop, Hopper,  
451 Laliberté, & Zúñiga-Feest, 2012). Reliance on mycorrhiza could depend on how much  
452 phosphorus is available, but also on the balance between phosphorus and nitrogen (i.e. the  
453 N:P ratio). Neither the anion-exchange-resin data we used as indicator of soil phosphorus  
454 availability nor the N:P ratio was related to the ‘collaboration’ gradient (though N:P was  
455 marginally positively associated with *c<sub>WM</sub>Mycorrhizal colonization*, Appendix S14).  
456 However, low resin-phosphorus was marginally related to the ‘slow’ side of the  
457 ‘conservation’ gradient. The nature of plant-available phosphorus in soil is still debated  
458 (Barrow, 2021). Phosphorus is also more available in slightly acidic soils (Alt, Oelmann,  
459 Herold, Schrumpf, & Wilcke, 2011). The pH of our soils ranged from acidic to slightly



460 alkaline (min. 4.5, max 7.5), with a mean of 6.5, and only 37 out of 150 plots have a pH  
461 between 6.5 and 7 which is often used as an optimum to assess phosphorus availability (Penn  
462 & Camberato, 2019). So, the positive effect of pH on the ‘collaboration’ gradient could  
463 indicate a lower P availability at high pH values. Furthermore, organic fertiliser, applied in  
464 the plots with high land-use intensity, is usually rich in P, and our land-use-intensity variable  
465 thus could capture part of the P supply that is not captured by resin-P ( $r=0.49$  between resin-P  
466 and land-use intensity, Appendix S11). In conclusion, we did not find a decrease of  
467 mycorrhizal colonization when P is more available through the effects of resin-P on  
468 ‘collaboration’ gradient (Fig. 3), but we cannot rule out an effect of P availability, because of  
469 the potential changes in phosphorus availability through fertilisation and pH changes. The  
470 proven P-limitation of plant growth (Klaus et al 2011) in plots allocated in the upper right  
471 corner of the PCA-diagram (outsourcing and slow) also points in this direction.

472         The relationships we found between the ‘conservation’ gradient and environmental  
473 variables are overall in line with expectations on how soil fertility should relate to the plant  
474 economic spectrum. Accordingly, high land-use-intensity and acidic soils with high  
475 phosphorus and nitrate concentrations were associated with the ‘fast’ strategy. The decrease  
476 in bud-bank size at higher soil fertility (Fig. 3, Appendix S14) is congruent with recent  
477 findings that land-use intensity and nitrogen addition decrease total bud density and rhizome  
478 biomass in temperate perennial grasslands (Qian, Wang, Klimešová, Lü, & Zhang, 2021;  
479 Ottaviani et al., 2021). Disturbance and habitat-productivity indices of species have been  
480 associated with an increase in specific leaf area and a decrease in bud-bank size (Herben,  
481 Klimešová, & Chytrý, 2018). In contrast to the negative effect of nitrate concentration on the  
482 ‘conservation’ gradient, we found a positive effect of soil ammonium concentration. Species  
483 preferences for specific nitrogen forms vary with ecological strategies. Early successional  
484 species, which are usually on the ‘fast’ side of the ‘conservation’ gradient, generally prefer

485 nitrate, whereas late successional species, which are usually on the ‘slow’ side, generally  
486 prefer ammonium (Britto & Kronzucker, 2002; Warren, 2009). It has also been shown that  
487 there might be a trade-off between nitrate and ammonium uptake in grassland species (Maire  
488 et al., 2009). Some plants can also inhibit nitrification, thereby retaining  $\text{NH}_4$ , which is less  
489 prone to leaching than  $\text{NO}_3$  (Boudsocq et al., 2012). High rates of nitrification in fertile soil  
490 with high microbial activity could lead to a stronger dominance of nitrogen in form of nitrate.  
491 Increase in ammonia oxidation with land-use intensity (and therefore fertilisation) has already  
492 been shown in our grassland system (Stempfhuber et al., 2014). So, the positive association  
493 between ‘fast’ communities and  $\text{NO}_3$  could reflect an overall higher nitrifying activity of  
494 microbial communities in fertile, nitrogen-rich soils. In conclusion, the form of nitrogen  
495 available in the soil has contrasting effects on belowground traits, with ammonium being  
496 more related to the ‘slow’ strategy and nitrate more related to the ‘fast’ strategy.

## 497 **Conclusion**

498 The dimensionality of trait syndromes and their relation to environmental variables are  
499 central questions in ecology. At the grassland community level, we found an integration of  
500 root branching intensity, root-weight ratio, bud-bank size and rooting depth within the  
501 bidimensional ‘collaboration’ and ‘conservation’ trait space previously observed at the  
502 species level. The variation of both gradients with environmental variables was partly  
503 overlapping and partly independent. Indicators of high soil fertility were generally associated  
504 with both the ‘fast’ and the ‘do-it-yourself’ strategies. Overall, our study shows that the  
505 belowground plant-strategy gradients identified among species are also applicable to the  
506 description of plant communities, and can be linked to environmental variables.

507

## 508 **Acknowledgments**

509 We thank Otmar Ficht, Maximilian Fuchs and Heinz Vahlenkamp for help setting up the  
510 experiments, Beate Rüter, Ekaterina Mamonova, Huy Manh Nguyen, Simon Gommel,  
511 Maximilian Rometsch, Anika Schick and Emma Bretherick for help measuring the plant  
512 traits. We also thank the managers of the three Biodiversity Exploratories, Konstanz Wells,  
513 Swen Renner, Kirsten Reichel-Jung, Sonja Gockel, Kerstin Wiesner, Katrin Lorenzen,  
514 Andreas Hemp, Martin Gorke and Miriam Teuscher, and all former managers for their work  
515 in maintaining the plot and project infrastructure; Christiane Fischer for giving support  
516 through the central office, Andreas Ostrowski for managing the central data base, and Markus  
517 Fischer, Eduard Linsenmair, Dominik Hessenmöller, Daniel Prati, Ingo Schöning, François  
518 Buscot, Ernst-Detlef Schulze, Wolfgang W. Weisser and the late Elisabeth Kalko for their  
519 role in setting up the Biodiversity Exploratories project. The work has been (partly) funded  
520 by the DFG Priority Program 1374 "Infrastructure-Biodiversity-Exploratories". Field work  
521 permits were issued by the responsible state environmental offices of Baden-Württemberg,  
522 Thüringen, and Brandenburg. We acknowledge funding from the German Research  
523 Foundation (DFG, grants KL 1866/12-1 to MvK and 323522591 to MR).

524

## 525 **Declarations**

526 Tom Lachaise performed three of the experiments, ran the analyses and wrote the paper.  
527 Joana Bergmann performed one experiment and participated in one of the other three.  
528 Matthias Rillig contributed to the design of the experiments. Norbert Hölzel, Valentin Klaus  
529 and Till Kleinebecker collected environmental data. Mark van Kleunen designed three of the  
530 experiments, advised on data analysis and extensively revised the paper. All authors  
531 contributed to revisions. The authors declare no conflicts of interest.

## 532 **Data availability**

533 The trait data will be archived in Dryad, and the data DOI will be included at the end of the  
534 article. The environmental data is partly publicly available on BExIS and partly under an  
535 embargo period of three years. It can be requested directly to the authors of the data (see  
536 Appendix S2).

## 537 References

- 538 Allan, E., Manning, P., Alt, F., Binkenstein, J., Blaser, S., & Blüthgen, N., ... Fischer, M. (2015). Land use  
539 intensification alters ecosystem multifunctionality via loss of biodiversity and changes to  
540 functional composition. *Ecology letters*, 18(8), 834–843. doi: 10.1111/ele.12469.
- 541 Alt, F., Oelmann, Y., Herold, N., Schruppf, M., & Wilcke, W. (2011). Phosphorus partitioning in  
542 grassland and forest soils of Germany as related to land-use type, management intensity, and  
543 land use-related pH. *Journal of Plant Nutrition and Soil Science*, 174(2), 195–209. doi:  
544 10.1002/jpln.201000142.
- 545 Augé, R.M. (2001). Water relations, drought and vesicular-arbuscular mycorrhizal symbiosis.  
546 *Mycorrhiza*, 1(11), 3–42. [https://www.infona.pl/resource/bwmeta1.element.springer-481cf429-](https://www.infona.pl/resource/bwmeta1.element.springer-481cf429-da27-30a4-9773-06373518f13a)  
547 [da27-30a4-9773-06373518f13a](https://www.infona.pl/resource/bwmeta1.element.springer-481cf429-da27-30a4-9773-06373518f13a).
- 548 Barrow, N.J. (2021). Comparing two theories about the nature of soil phosphate. *European Journal*  
549 *of Soil Science*, 72(2), 679–685. doi: 10.1111/ejss.13027.
- 550 Bergmann, J., Weigelt, A., van der Plas, F., Laughlin, D.C., Kuyper, T.W., & Guerrero-Ramirez, N., ...  
551 Mommer, L. (2020). The fungal collaboration gradient dominates the root economics space in  
552 plants. *Science Advances*, 6(27), eaba3756. doi: 10.1126/sciadv.aba3756.
- 553 Blanke, V., Renker, C., Wagner, M., Füllner, K., Held, M., Kuhn, A.J., & Buscot, F. (2005). Nitrogen  
554 supply affects arbuscular mycorrhizal colonization of *Artemisia vulgaris* in a phosphate-polluted  
555 field site. *New Phytologist*, 166(3), 981–992. doi: 10.1111/j.1469-8137.2005.01374.x.
- 556 Blanke, V., Wagner, M., Renker, C., Lippert, H., Michulitz, M., Kuhn, A.J., & Buscot, F. (2011).  
557 Arbuscular mycorrhizas in phosphate-polluted soil: interrelations between root colonization and  
558 nitrogen. *Plant and Soil*, 343(1-2), 379–392. doi: 10.1007/s11104-011-0727-9.
- 559 Blüthgen, N., Dormann, C.F., Prati, D., Klaus, V.H., Kleinebecker, T., & Hölzel, N., ... Weisser, W.W.  
560 (2012). A quantitative index of land-use intensity in grasslands: Integrating mowing, grazing and  
561 fertilization. *Basic and Applied Ecology*, 13(3), 207–220. doi: 10.1016/j.baae.2012.04.001.
- 562 Boudsocq, S., Niboyet, A., Lata, J.C., Raynaud, X., Loeuille, N., & Mathieu, J., ... Barot, S. (2012). Plant  
563 preference for ammonium versus nitrate: a neglected determinant of ecosystem functioning?  
564 *The American naturalist*, 180(1), 60–69. doi: 10.1086/665997.
- 565 Breitschwerdt, E., Jandt, U., & Bruelheide, H. (2019). Trait-performance relationships of grassland  
566 plant species differ between common garden and field conditions. *Ecology and Evolution*, 9(4),  
567 1691–1701. doi: 10.1002/ece3.4818.
- 568 Britto, D.T. & Kronzucker, H.J. (2002). NH<sub>4</sub><sup>+</sup> toxicity in higher plants: a critical review. *Journal of Plant*  
569 *Physiology*, 159(6), 567–584. doi: 10.1078/0176-1617-0774.
- 570 Busch, V., Klaus, V.H., Schäfer, D., Prati, D., Boch, S., & Müller, J., ... Kleinebecker, T. (2019). Will I stay  
571 or will I go? Plant species-specific response and tolerance to high land-use intensity in temperate  
572 grassland ecosystems. *Journal of Vegetation Science*, 30(4), 674–686. doi: 10.1111/jvs.12749.
- 573 Cayuela, L., La Granzow-de Cerda, Á., Albuquerque, F.S., & Golicher, D.J. (2012). taxonstand: An r  
574 package for species names standardisation in vegetation databases. *Methods in Ecology and*  
575 *Evolution*, 3(6), 1078–1083. doi: 10.1111/j.2041-210X.2012.00232.x.
- 576 Chave, J., Coomes, D., Jansen, S., Lewis, S.L., Swenson, N.G., & Zanne, A.E. (2009). Towards a  
577 worldwide wood economics spectrum. *Ecology Letters*, 12(4), 351–366. doi: 10.1111/j.1461-  
578 0248.2009.01285.x.

- 579 Craine, J.M., Froehle, J., Tilman, D.G., Wedin, D.A., & Chapin, I.F.S. (2001). The relationships among  
580 root and leaf traits of 76 grassland species and relative abundance along fertility and disturbance  
581 gradients. *Oikos*, 93(2), 274–285. doi: 10.1034/j.1600-0706.2001.930210.x.
- 582 de Bello, F., Lavorel, S., Díaz, S., Harrington, R., Cornelissen, J.H.C., & Bardgett, R.D., ... Harrison, P.A.  
583 (2010). Towards an assessment of multiple ecosystem processes and services via functional traits.  
584 *Biodiversity and Conservation*, 19(10), 2873–2893. doi: 10.1007/s10531-010-9850-9.
- 585 Delpiano, C.A., Prieto, I., Loayza, A.P., Carvajal, D.E., & Squeo, F.A. (2020). Different responses of leaf  
586 and root traits to changes in soil nutrient availability do not converge into a community-level  
587 plant economics spectrum. *Plant and Soil*, 1–16. doi: 10.1007/s11104-020-04515-2.
- 588 Díaz, S., Kattge, J., Cornelissen, J.H.C., Wright, I.J., Lavorel, S., & Dray, S., ... Gorné, L.D. (2016). The  
589 global spectrum of plant form and function. *Nature*, 529(7585), 167–171. doi:  
590 10.1038/nature16489.
- 591 Ding, J., Kong, D., Zhang, Z., Cai, Q., Xiao, J., Liu, Q., & Yin, H. (2020). Climate and soil nutrients  
592 differentially drive multidimensional fine root traits in ectomycorrhizal-dominated alpine  
593 coniferous forests. *Journal of Ecology*. doi: 10.1111/1365-2745.13407.
- 594 Erktan, A., Roumet, C., Bouchet, D., Stokes, A., Pailler, F., & Munoz, F. (2018). Two dimensions define  
595 the variation of fine root traits across plant communities under the joint influence of ecological  
596 succession and annual mowing. *Journal of Ecology*, 106(5), 2031–2042. doi: 10.1111/1365-  
597 2745.12953.
- 598 Fan, Y., Miguez-Macho, G., Jobbágy, E.G., Jackson, R.B., & Otero-Casal, C. (2017). Hydrologic  
599 regulation of plant rooting depth. *Proceedings of the National Academy of Sciences*, 114(40),  
600 10572–10577. doi: 10.1073/pnas.1712381114.
- 601 Fischer, M., Bossdorf, O., Gockel, S., Hänsel, F., Hemp, A., & Hessenmöller, D., ... Weisser, W.W.  
602 (2010). Implementing large-scale and long-term functional biodiversity research: The Biodiversity  
603 Exploratories. *Basic and Applied Ecology*, 11(6), 473–485. doi: 10.1016/j.baae.2010.07.009.
- 604 Freschet, G.T., Roumet, C., Comas, L.H., Weemstra, M., Bengough, A.G., & Rewald, B., ... Stokes, A.  
605 (2020). Root traits as drivers of plant and ecosystem functioning: current understanding, pitfalls  
606 and future research needs. *New Phytologist*. doi: 10.1111/nph.17072.
- 607 Garnier, E., Lavorel, S., Ansquer, P., Castro, H., Cruz, P., & Dolezal, J., ... Zarovali, M.P. (2007).  
608 Assessing the effects of land-use change on plant traits, communities and ecosystem functioning  
609 in grasslands: a standardized methodology and lessons from an application to 11 European sites.  
610 *Annals of Botany*, 99(5), 967–985. doi: 10.1093/aob/mcl215.
- 611 Garnier, E., Navas, M.-L., & Grigulis, K. (2016). Gradients, response traits, and ecological strategies In  
612 (Eds.)E. Garnier *et al.*, *Plant functional diversity. Organism traits, community structure, and*  
613 *ecosystem properties*. Oxford: Oxford University Press.
- 614 Güsewell, S. (2004). N : P ratios in terrestrial plants: variation and functional significance. *New*  
615 *Phytologist*, 164(2), 243–266. doi: 10.1111/j.1469-8137.2004.01192.x.
- 616 Hanisch, M., Schweiger, O., Cord, A.F., Volk, M., & Knapp, S. (2020). Plant functional traits shape  
617 multiple ecosystem services, their trade-offs and synergies in grasslands. *Journal of Applied*  
618 *Ecology*. doi: 10.1111/1365-2664.13644.
- 619 Hautier, Y., Niklaus, P.A., & Hector, A. (2009). Competition for light causes plant biodiversity loss  
620 after eutrophication. *Science*, 324(5927), 636–638. doi: 10.1126/science.1169640.
- 621 Hempel, S., Götzenberger, L., Kühn, I., Michalski, S.G., Rillig, M.C., Zobel, M., & Moora, M. (2013).  
622 Mycorrhizas in the Central European flora: relationships with plant life history traits and ecology.  
623 *Ecology*, 94(6), 1389–1399. doi: 10.1890/12-1700.1.

- 624 Herben, T. & Klimešová, J. (2020). Evolution of clonal growth forms in angiosperms. *New Phytologist*.  
625 doi: 10.1111/nph.16188.
- 626 Herben, T., Klimešová, J., & Chytrý, M. (2018). Effects of disturbance frequency and severity on plant  
627 traits: An assessment across a temperate flora. *Functional Ecology*, 32(3), 799–808. doi:  
628 10.1111/1365-2435.13011.
- 629 Klaus, V.H., Kleinebecker, T., Hölzel, N., Blüthgen, N., Boch, S., & Müller, J., ... Fischer, M. (2011).  
630 Nutrient concentrations and fibre contents of plant community biomass reflect species richness  
631 patterns along a broad range of land-use intensities among agricultural grasslands. *Perspectives*  
632 *in Plant Ecology, Evolution and Systematics*, 13(4), 287–295. doi: 10.1016/j.ppees.2011.07.001.
- 633 Kleinebecker, T., Hölzel, N., Prati, D., Schmitt, B., Fischer, M., & Klaus, V.H. (2014). Evidence from the  
634 real world: 15 N natural abundances reveal enhanced nitrogen use at high plant diversity in  
635 Central European grasslands. *Journal of Ecology*, 102(2), 456–465. doi: 10.1111/1365-  
636 2745.12202.
- 637 Kleyer, M., Bekker, R.M., Knevel, I.C., Bakker, J.P., Thompson, K., & Sonnenschein, M., ... Peco, B.  
638 (2008). The LEDA Traitbase: a database of life-history traits of the Northwest European flora.  
639 *Journal of Ecology*, 96(6), 1266–1274. doi: 10.1111/j.1365-2745.2008.01430.x.
- 640 Klimešová, J., Danihelka, J., Chrtěk, J., de Bello, F., & Herben, T. (2017). CLO-PLA: a database of clonal  
641 and bud-bank traits of the Central European flora. *Ecology*, 98(4), 1179. doi: 10.1002/ecy.1745.
- 642 Klimešová, J., Martínková, J., & Herben, T. (2018). Horizontal growth: An overlooked dimension in  
643 plant trait space. *Perspectives in Plant Ecology, Evolution and Systematics*, 32, 18–21. doi:  
644 10.1016/j.ppees.2018.02.002.
- 645 Klimešová, J., Martínková, J., & Ottaviani, G. (2018). Belowground plant functional ecology: Towards  
646 an integrated perspective. *Functional Ecology*, 32(9), 2115–2126. doi: 10.1111/1365-2435.13145.
- 647 Klimešová, J., Tackenberg, O., & Herben, T. (2016). Herbs are different: clonal and bud bank traits  
648 can matter more than leaf–height–seed traits. *New Phytologist*, 210(1), 13–17. doi:  
649 10.1111/nph.13788.
- 650 Kong, D., Ma, C., Zhang, Q., Le Li, Chen, X., Zeng, H., & Guo, D. (2014). Leading dimensions in  
651 absorptive root trait variation across 96 subtropical forest species. *New Phytologist*, 203(3), 863–  
652 872. doi: 10.1111/nph.12842.
- 653 Kramer-Walter, K.R., Bellingham, P.J., Millar, T.R., Smissen, R.D., Richardson, S.J., & Laughlin, D.C.  
654 (2016). Root traits are multidimensional: specific root length is independent from root tissue  
655 density and the plant economic spectrum. *Journal of Ecology*, 104(5), 1299–1310. doi:  
656 10.1111/1365-2745.12562.
- 657 Lachaise, T., Bergmann, J., Rillig, M.C., & van Kleunen, M. (2020). Below- and aboveground traits  
658 explain local abundance, and regional, continental and global occurrence frequencies of grassland  
659 plants. *Oikos*. doi: 10.1111/oik.07874.
- 660 Ladouceur, E., Bonomi, C., Bruelheide, H., Klimešová, J., Burrascano, S., & Poschlod, P., ...  
661 Jiménez-Alfaro, B. (2019). The functional trait spectrum of European temperate grasslands.  
662 *Journal of Vegetation Science*, 14, 291. doi: 10.1111/jvs.12784.
- 663 Laliberté, E. (2017). Below-ground frontiers in trait-based plant ecology. *New Phytologist*, 213(4),  
664 1597–1603. doi: 10.1111/nph.14247.
- 665 Lambers, H., Bishop, J.G., Hopper, S.D., Laliberté, E., & Zúñiga-Feest, A. (2012). Phosphorus-  
666 mobilization ecosystem engineering: the roles of cluster roots and carboxylate exudation in  
667 young P-limited ecosystems. *Annals of Botany*, 110(2), 329–348. doi: 10.1093/aob/mcs130.

- 668 Laughlin, D.C., Mommer, L., Sabatini, F.M., Bruelheide, H., Kuyper, T.W., & McCormack, M.L., ...  
669 Weigelt, A. (2021). Root traits explain plant species distributions along climatic gradients yet  
670 challenge the nature of ecological trade-offs. *Nature Ecology & Evolution*, 1–12. doi:  
671 10.1038/s41559-021-01471-7.
- 672 Ma, X., Geng, Q., Zhang, H., Bian, C., Chen, H.Y., Jiang, D., & Xu, X. (2020). Global negative effects of  
673 nutrient enrichment on arbuscular mycorrhizal fungi, plant diversity and ecosystem  
674 multi-functionality. *New Phytologist*. doi: 10.1111/nph.17077.
- 675 Maire, V., Gross, N., Da Silveira Pontes, L., Picon-Cochard, C., & Soussana, J.-F. (2009). Trade-off  
676 between root nitrogen acquisition and shoot nitrogen utilization across 13 co-occurring pasture  
677 grass species. *Functional Ecology*, 23(4), 668–679. doi: 10.1111/j.1365-2435.2009.01557.x.
- 678 McGonigle, T.P., Miller, M.H., Evans, D.G., Fairchild, G.L., & Swan, J.A. (1990). A new method which  
679 gives an objective measure of colonization of roots by vesicular-arbuscular mycorrhizal fungi.  
680 *New Phytologist*, 115(3), 495–501. doi: 10.1111/j.1469-8137.1990.tb00476.x.
- 681 Mommer, L., van Ruijven, J., Caluwe, H. de, Smit-Tiekstra, A.E., Wagemaker, C.A., & Joop Ouborg, N.,  
682 ... Kroon, H. de (2010). Unveiling below-ground species abundance in a biodiversity experiment: a  
683 test of vertical niche differentiation among grassland species. *Journal of Ecology*, 98(5), 1117–  
684 1127. doi: 10.1111/j.1365-2745.2010.01702.x.
- 685 Mueller, K.E., Tilman, D., Fornara, D.A., & Hobbie, S.E. (2013). Root depth distribution and the  
686 diversity–productivity relationship in a long-term grassland experiment. *Ecology*, 94(4), 787–793.  
687 doi: 10.1890/12-1399.1.
- 688 Ottaviani, G., Lubbe, F.C., Lepš, J., Lisner, A., Martínková, J., Mudrák, O., & Klimešová, J. (2021).  
689 Strong impact of management regimes on rhizome biomass across Central European temperate  
690 grasslands. *Ecological Applications*, e2317. doi: 10.1002/eap.2317.
- 691 Penn, C. & Camberato, J. (2019). A critical review on soil chemical processes that control how soil pH  
692 affects phosphorus availability to plants. *Agriculture*, 9(6), 120. doi: 10.3390/agriculture9060120.
- 693 Pierce, S., Brusa, G., Vagge, I., & Cerabolini, B.E.L. (2013). Allocating CSR plant functional types: the  
694 use of leaf economics and size traits to classify woody and herbaceous vascular plants. *Functional*  
695 *Ecology*, 27(4), 1002–1010. doi: 10.1111/1365-2435.12095.
- 696 Pornon, A., Escaravage, N., & Lamaze, T. (2007). Complementarity in mineral nitrogen use among  
697 dominant plant species in a subalpine community. *American journal of botany*, 94(11), 1778–  
698 1785. doi: 10.3732/ajb.94.11.1778.
- 699 Prieto, I., Roumet, C., Cardinael, R., Dupraz, C., Jourdan, C., & Kim, J.H., ... Stokes, A. (2015). Root  
700 functional parameters along a land-use gradient: evidence of a community-level economics  
701 spectrum. *Journal of Ecology*, 103(2), 361–373. doi: 10.1111/1365-2745.12351.
- 702 Qian, J., Wang, Z., Klimešová, J., Lü, X., & Zhang, C. (2021). Belowground bud bank and its  
703 relationship with aboveground vegetation under watering and nitrogen addition in temperate  
704 semiarid steppe. *Ecological Indicators*, 125, 107520. doi: 10.1016/j.ecolind.2021.107520.
- 705 R Core Team (2020). *R: A Language and Environment for Statistical Computing*. Vienna, Austria.  
706 <https://www.R-project.org/>.
- 707 Reynolds, H.L. & D'Antonio, C. (1996). The ecological significance of plasticity in root weight ratio in  
708 response to nitrogen: Opinion. *Plant and Soil*, 185(1), 75–97. doi: 10.1007/BF02257566.
- 709 Robinson, D. (2001).  $\delta^{15}\text{N}$  as an integrator of the nitrogen cycle. *Trends in Ecology & Evolution*,  
710 16(3), 153–162. doi: 10.1016/S0169-5347(00)02098-X.



- 711 Roddy, A.B., Martínez-Perez, C., Teixido, A.L., Cornelissen, T.G., Olson, M.E., Oliveira, R.S., & Silveira,  
712 F.A.O. (2020). Towards the flower economics spectrum. *New Phytologist*, 229(2), 665–672. doi:  
713 10.1111/nph.16823.
- 714 Roumet, C., Urcelay, C., & Díaz, S. (2006). Suites of root traits differ between annual and perennial  
715 species growing in the field. *New Phytologist*, 170(2), 357–368. doi: 10.1111/j.1469-  
716 8137.2006.01667.x.
- 717 Schachtschabel, P., Blume, H.-P., Brümmer, G., Hartge, K.-H., & Schwertmann, U. (1998). *Lehrbuch*  
718 *der Bodenkunde* (14th ed.). Enke Verlag Stuttgart.
- 719 Schenk, H.J. & Jackson, R.B. (2002). The global biogeography of roots. *Ecological Monographs*, 72(3),  
720 311–328. doi: 10.1890/0012-9615(2002)072[0311:TGBOR]2.0.CO;2.
- 721 Schroeder-Georgi, T., Wirth, C., Nadrowski, K., Meyer, S.T., Mommer, L., & Weigelt, A. (2016). From  
722 pots to plots: hierarchical trait-based prediction of plant performance in a mesic grassland.  
723 *Journal of Ecology*, 104(1), 206–218. doi: 10.1111/1365-2745.12489.
- 724 Shipley, B., de Bello, F., Cornelissen, J.H.C., Laliberté, E., Laughlin, D.C., & Reich, P.B. (2016).  
725 Reinforcing loose foundation stones in trait-based plant ecology. *Oecologia*, 180(4), 923–931. doi:  
726 10.1007/s00442-016-3549-x.
- 727 Solbrig, O.T. (1993). Plant traits and adaptive strategies: their role in ecosystem function In (Ed.)E.-D.  
728 Schulze, *Biodiversity and Ecosystem Function* (pp. 97–116). Berlin, Heidelberg: Springer Berlin  
729 Heidelberg.
- 730 Stempfhuber, B., Welzl, G., Wubet, T., Schöning, I., Marhan, S., & Buscot, F., ... Schloter, M. (2014).  
731 Drivers for ammonia-oxidation along a land-use gradient in grassland soils. *Soil biology &*  
732 *biochemistry*, 69, 179–186. doi: 10.1016/j.soilbio.2013.11.007.
- 733 Suttie, J.M., Reynolds, S.G., & Batello, C. (2005). *Grasslands of the World*. Food & Agriculture Org.  
734 van der Plas, F., Schröder-Georgi, T., Weigelt, A., Barry, K., Meyer, S., & Alzate, A., ... Wirth, C. (2020).  
735 Plant traits alone are poor predictors of ecosystem properties and long-term ecosystem  
736 functioning. *Nature Ecology & Evolution*, 4(12), 1602–1611. doi: 10.1038/s41559-020-01316-9.
- 737 Warren, C.R. (2009). Does nitrogen concentration affect relative uptake rates of nitrate, ammonium,  
738 and glycine? *Journal of Plant Nutrition and Soil Science*, 172(2), 224–229. doi:  
739 10.1002/jpln.200800251.
- 740 Weemstra, M., Mommer, L., Visser, E.J.W., van Ruijven, J., Kuyper, T.W., Mohren, G.M.J., & Sterck,  
741 F.J. (2016). Towards a multidimensional root trait framework: a tree root review. *New*  
742 *Phytologist*, 211(4), 1159–1169. doi: 10.1111/nph.14003.
- 743 Weigelt, A., Bol, R., & Bardgett, R.D. (2005). Preferential uptake of soil nitrogen forms by grassland  
744 plant species. *Oecologia*, 142(4), 627–635. doi: 10.1007/s00442-004-1765-2.
- 745 Westoby, M., Falster, D.S., Moles, A.T., Vesk, P.A., & Wright, I.J. (2002). Plant ecological strategies:  
746 some leading dimensions of variation between species. *Annual Review of Ecology and*  
747 *Systematics*, 33(1), 125–159. doi: 10.1146/annurev.ecolsys.33.010802.150452.
- 748 Wright, I.J., Reich, P.B., Westoby, M., Ackerly, D.D., Baruch, Z., & Bongers, F., ... Villar, R. (2004). The  
749 worldwide leaf economics spectrum. *Nature*, 428(6985), 821–827. doi: 10.1038/nature02403.
- 750 Zhou, M., Bai, W., Zhang, Y., & Zhang, W.-H. (2018). Multi-dimensional patterns of variation in root  
751 traits among coexisting herbaceous species in temperate steppes. *Journal of Ecology*, 106(6),  
752 2320–2331. doi: 10.1111/1365-2745.12977.
- 753
